# Supplementary material for: The Link between Trace Metal Elements and Glucose Metabolism: Evidence from Zinc, Copper, Iron, and Manganese-Mediated Metabolic Regulation
Source: MDPI journal article supplement (doi:10.3390/metabo13101048), 2023-10-02
Supplement: s1 [file s1]

**Supplementary Table S1. Implications of trace metal elements in diabetic therapy.**

| Metal         | Method                                                        | Samples                                              | Results                                                                                                                               | References |
|---------------|---------------------------------------------------------------|------------------------------------------------------|---------------------------------------------------------------------------------------------------------------------------------------|------------|
| <b>Copper</b> | Oral tetrathiomolybdate intake (TETA, copper chelating agent) | C57BL/KsJ-db/db mice                                 | TETA improves insulin resistance and restored glucose intolerance, reduces serum triglyceride levels.                                 | [80]       |
|               | Oral TETA intake                                              | Wistar rats, injection of STZ,                       | TETA reduces diabetic complications damage, increases the activity of SOD.                                                            | [158]      |
|               | Oral TETA intake                                              | Wistar rats, injection of STZ,                       | TETA attenuates diabetic kidney disease by suppressing the activity of activation of TGF- $\beta$ signaling.                          | [159]      |
|               | Pretreat with CuCl <sub>2</sub> ·2H <sub>2</sub> O            | 3T3-L1 cells                                         | High copper level can restore the activity of insulin signaling by down-regulating PTEN protein in adipocytes.                        | [86]       |
|               | Copper-containing fabric bedding                              | High fat, high cholesterol diet induced obesity mice | With contrary of control, mouse housed on copper-containing fabric bedding has less Reduces body weight, increases glucose tolerance. | [160]      |
|               | Foods with high level zinc                                    | U.S. T2D Women                                       | In part, higher zinc intake can diminish the risk of T2D.                                                                             | [161]      |
|               | Foods contain zinc                                            | French Women, a prospective cohort study             | Obesity women with zinc intake >8mg/day and low Cu/Zn ratio reduces the risk of T2D.                                                  | [162]      |

|                  |                                                                              |                                                      |                                                                                                                                                                                                                    |       |
|------------------|------------------------------------------------------------------------------|------------------------------------------------------|--------------------------------------------------------------------------------------------------------------------------------------------------------------------------------------------------------------------|-------|
| <b>Zinc</b>      | Oral zinc sulfate intake                                                     | T2D patients, adult-onset                            | Zinc supplementation improves glucose control, changes serum cholesterol level and the ratio of cholesterol/high-density lipoprotein. Zinc sulfate and multivitamin/mineral has the potential to protect diabetes. | [163] |
|                  | Oral intake of zinc threoninate chelate                                      | Wistar rats, STZ injection                           | Zinc threoninate chelate reduces serum glucose concentration, increases insulin levels and the activation of Cu/Zn-SOD.                                                                                            | [164] |
|                  | Oral zinc sulfate intake                                                     | Swiss albino rats, STZ injection                     | Zinc sulfate increases GSH levels in kidney, enhances antioxidant potential, defenses kidney damage.                                                                                                               | [165] |
| <b>Iron</b>      | Oral DFO intake                                                              | White diabetic patients with high levels of ferritin | To high-ferritin diabetic patients, DFO has a positive effect to reduce glucose, triglyceride and HbA1c.                                                                                                           | [166] |
|                  | Dietary iron-restriction (35 mg/kg iron);                                    | Ob/Ob mice with T2D                                  | Iron-restricted diet can ameliorate insulin sensitivity and $\beta$ -islet cell function.                                                                                                                          | [167] |
|                  | Oral DFO intake                                                              | KKAy mice                                            | Iron chelator decreases macrophage infiltration into fat, leading to lower inflammatory cytokines and oxidative stress, which ameliorates a vicious cycle in obesity.                                              | [168] |
|                  | Oral ferrous fumarate intake                                                 | Non-anemic pregnant women                            | Early iron supplementation increases the risk of gestational diabetes.                                                                                                                                             | [169] |
| <b>Manganese</b> | Injection of 12 mg/kg MnCl <sub>2</sub>                                      | C57BL/6J mice with a high-fat diet                   | Mn treatment increases insulin secretory capacity of $\beta$ -islet cell and the activity of Mn-SOD.                                                                                                               | [102] |
|                  | Gavage MnCl <sub>2</sub> solution or cells pretreated with MnCl <sub>2</sub> | Zucker diabetic fatty rats                           | Mn supplementation increases adiponectin and protect endothelial dysfunction in diabetes.                                                                                                                          | [103] |

|                                                                              |                            |                                                                                                                                                                        |       |
|------------------------------------------------------------------------------|----------------------------|------------------------------------------------------------------------------------------------------------------------------------------------------------------------|-------|
| Gavage MnCl <sub>2</sub> solution or cells pretreated with MnCl <sub>2</sub> | Zucker diabetic fatty rats | Mn supplements can decrease ICAM-1 expression and ROS, reduces adhesion of monocytes to endothelial cells, diminishes the risk of vascular disease in diabetic animals | [170] |
| Consume food with Mn                                                         | Chinese adults with T2D    | Mn intake and the incidence of diabetes have a negative association.                                                                                                   | [171] |

T2D: Diabetes mellitus type 2; TETA, triethylenetetramine; STZ, streptozotocin; SOD, superoxide dismutase; GSH, glutathione; DFO, deferoxamine.
